# Supplementary material
Source: MDPI journal article supplement (https://www.mdpi.com/2073-4441/14/13/2040)
Supplement: s1 [file s1]

# A Mesoporous Faujasite Prepared by Space-Confined Method for Highly Effective Selectivity of Copper Ions

Yi Chen <sup>1</sup>, Shiyue Wei <sup>1</sup>, Shuai Dong <sup>1</sup>, Jinchuan Gu <sup>1,\*</sup> and Wenju Jiang <sup>2</sup>

## Supplementary Materials

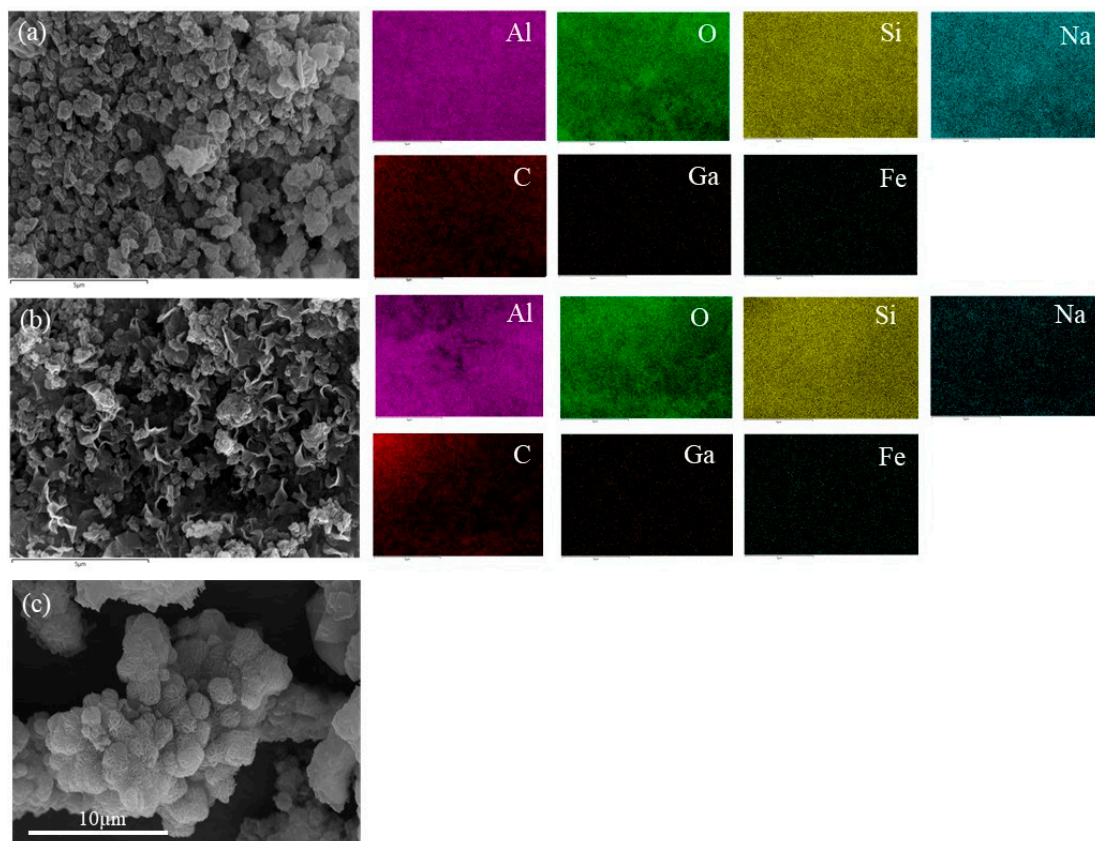

**Figure S1.** SEM micrograph and the EDS mapping analysis of HN-WSB-Z (a), GZ (b) and the SEM micrograph of Z (c).

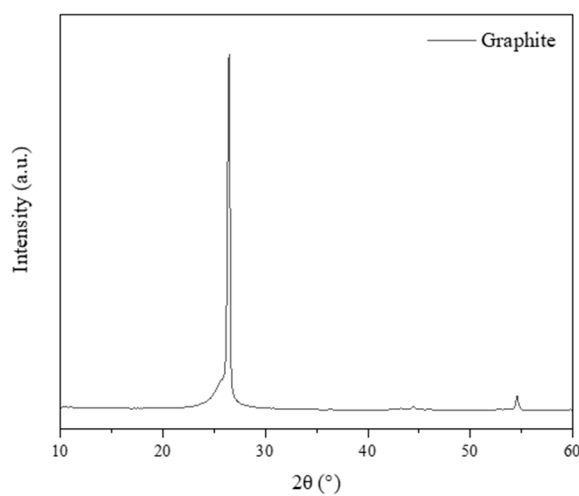

Figure S2. XRD patterns of graphite.

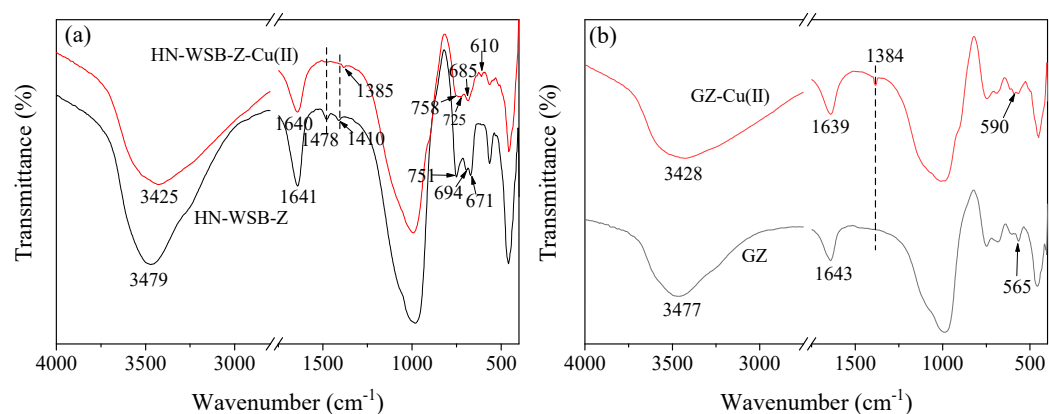

Figure S3. FTIR spectra of HN-WSB-Z and HN-WSB-Z-Cu(II) (a), GZ and GZ-Cu(II) (b).

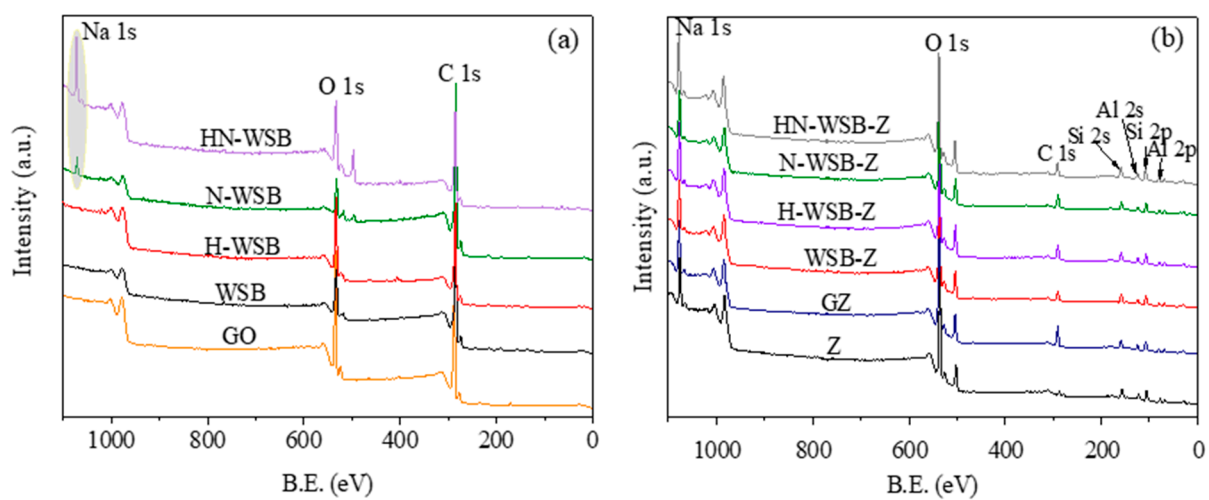

Figure S4. XPS wide-scan spectra of GO and different biochar (a), GO composite FAU, different biochar composite FAUs and pure FAU (Z) (b).

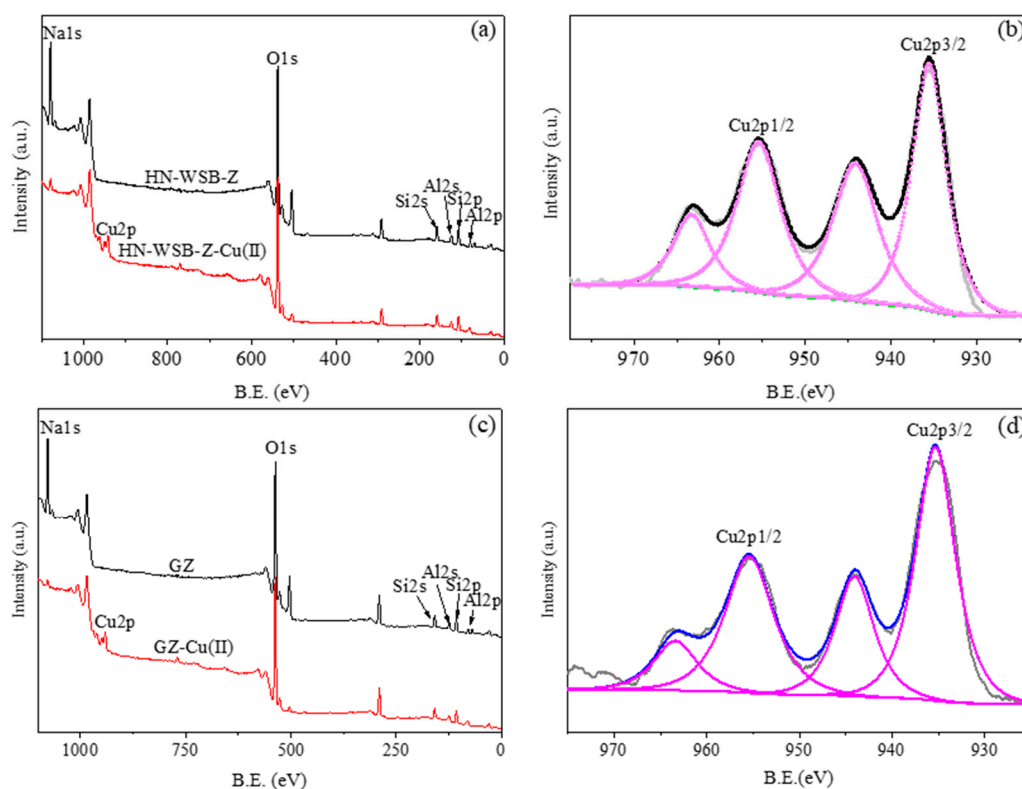

**Figure S5.** XPS wide-scan spectra of HN-WSB-Z (a) and GZ (c), Cu 2p spectrum of HN-WSB-Z-Cu(II) (b) and GZ-Cu(II) (d).

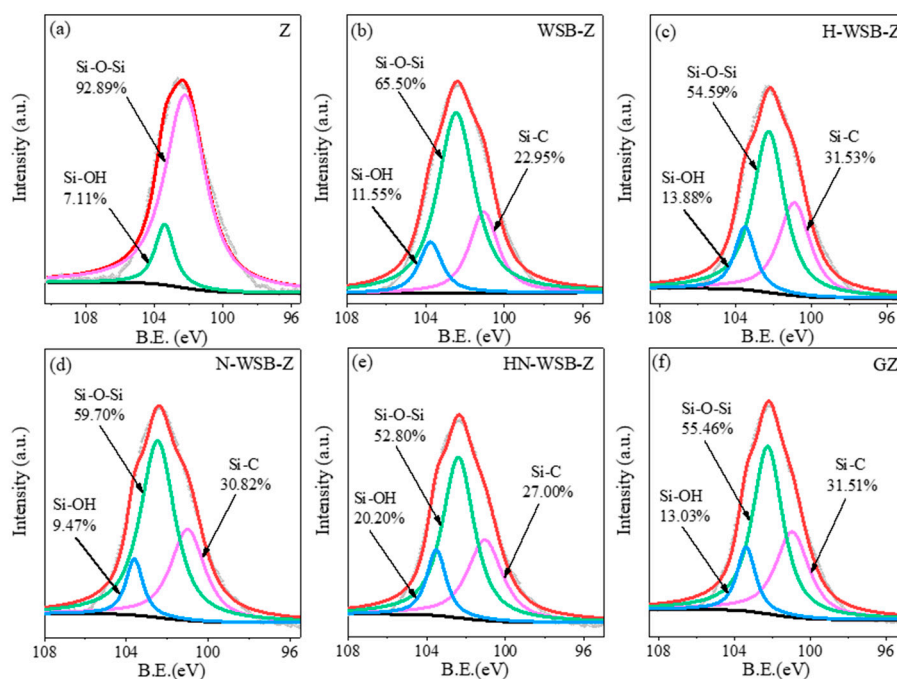

**Figure S6.** Si 2p spectrum of Z (a), WSB-Z (b), H-WSB-Z (c), N-WSB-Z (d), HN-WSB-Z (e) and GZ (f).

**Table S1.** The crystallite dimensions of the main lattice planes of different composite FAUs.

| Lattice planes | (111) | (642) |
|----------------|-------|-------|
| Z              | 450   | 583   |
| WSB-Z          | 587   | 605   |
| H-WSB-Z        | 592   | 617   |
| N-WSB-Z        | 627   | 631   |
| HN-WSB-Z       | 526   | 689   |
| GZ             | 511   | 493   |

**Table S2.** Kinetics and isothermal adsorption fitting data of HN-WSB-Z and GZ.

| Model      | Fitting parameters                                                  | GZ     | HN-WSB-Z |
|------------|---------------------------------------------------------------------|--------|----------|
| Isothermal | $q_{e,exp}$ (mg g <sup>-1</sup> )                                   | 93.38  | 94.74    |
|            | $q_{e,cal}$ (mg g <sup>-1</sup> )                                   | 108.68 | 115.65   |
|            | $K_L$ (mL mg <sup>-1</sup> )                                        | 2.97   | 2.63     |
|            | $R^2$                                                               | 0.9889 | 0.9927   |
|            | $K_F$ ((mg g <sup>-1</sup> )/(L mg <sup>-1</sup> ) <sup>1/n</sup> ) | 71.90  | 74.27    |
|            | 1/n                                                                 | 9.47   | 0.11     |
| Kinetics   | $R^2$                                                               | 0.8384 | 0.8173   |
|            | $q_{e,cal}$ (mg g <sup>-1</sup> )                                   | 82.81  | 85.66    |
|            | $K_1$ (min <sup>-1</sup> )                                          | 0.22   | 0.18     |
|            | $R^2$                                                               | 0.8510 | 0.8707   |
|            | $q_{e,cal}$ (mg g <sup>-1</sup> )                                   | 95.52  | 96.50    |
|            | $K_2$ ( $\times 10^{-3}$ g (mg min) <sup>-1</sup> )                 | 1.34   | 1.45     |
|            | $R^2$                                                               | 1.0000 | 1.0000   |

**Table S3.**  $\alpha_k^i$  values of GZ and HN-WSB-Z on multicomponent bivalent metal ions.

| .        | Cu(II) | Zn(II) | Mn(II) | Ni(II) | Co(II) | Mg(II) |
|----------|--------|--------|--------|--------|--------|--------|
| GZ       | 51.75  | 0      | 0      | 0      | 0      | 0      |
| HN-WSB-Z | 41.44  | 0      | 0      | 0      | 0      | 0      |
